# Supplementary material
Source: PubMed Central journal article supplement (PMC3929264)
Supplement: NIHMS537080-supplement-Nat__Methods_Hens_et_al__Suppl.pdf [file NIHMS537080-supplement-Nat__Methods_Hens_et_al__Suppl.pdf]

## Automated protein-DNA interaction screening of *Drosophila* regulatory elements

Korneel Hens, Jean-Daniel Feuz, Alina Isakova, Antonina Iagovitina, Andreas Massouras, Julien Bryois, Patrick Callaerts, Susan E Celniker & Bart Deplancke

|                                |                                                                                                   |
|--------------------------------|---------------------------------------------------------------------------------------------------|
| <b>Supplementary Figure 1</b>  | Distribution of DNA-binding domains within the <i>Drosophila</i> transcription factor repertoire. |
| <b>Supplementary Figure 2</b>  | Representative TIDY-processed images for the <i>so10</i> Y1H screen.                              |
| <b>Supplementary Figure 3</b>  | <i>lacZ</i> read-out of the <i>so10</i> Y1H screen.                                               |
| <b>Supplementary Figure 4</b>  | Output of the TIDY program.                                                                       |
| <b>Supplementary Figure 5</b>  | Representative TIDY-processed images for the <i>ng-EcRE</i> Y1H screen.                           |
| <b>Supplementary Figure 6</b>  | Representative TIDY-processed images for the <i>eve-stripe2</i> Y1H screen.                       |
| <b>Supplementary Figure 7</b>  | Representative TIDY-processed images for the <i>yp1-1</i> Y1H screen.                             |
| <b>Supplementary Figure 8</b>  | Representative TIDY-processed images for the <i>dpp813</i> Y1H screen.                            |
| <b>Supplementary Figure 9</b>  | Representative TIDY-processed images for the <i>EF3418</i> Y1H screen.                            |
| <b>Supplementary Figure 10</b> | screen of positive control interactions.                                                          |
| <b>Supplementary Figure 11</b> | <i>lacZ</i> read-out of the <i>dpp813</i> Y1H screen.                                             |
| <b>Supplementary Figure 12</b> | Representative TIDY-processed images for the <i>dpp813-Frag1</i> Y1H screen.                      |
| <b>Supplementary Figure 13</b> | Representative TIDY-processed images for the <i>dpp813-Frag2</i> Y1H screen.                      |
| <b>Supplementary Figure 14</b> | Representative TIDY-processed images for the <i>dpp813-Frag3</i> Y1H screen.                      |
| <b>Supplementary Figure 15</b> | Representative TIDY-processed images for the <i>dpp813-Frag-RC</i> Y1H screen.                    |
| <b>Supplementary Figure 16</b> | MARE analysis of <i>so10</i> for recognition by Y1H-identified transcription factors.             |
| <b>Supplementary Figure 17</b> | MARE analysis of <i>yp1-1</i> for recognition by Y1H-identified transcription factors.            |
| <b>Supplementary Figure 18</b> | Eye phenotypes observed upon RNAi-mediated knock-down of Y1H-identified transcription factors.    |
| <b>Supplementary Table 2</b>   | Observed interactions in two independent Y1H screens.                                             |
| <b>Supplementary Table 4</b>   | Manual screening of reported interactions.                                                        |
| <b>Supplementary Table 5</b>   | <i>dpp813-Frag1-3</i> and <i>dpp813-RC</i> interactions.                                          |
| <b>Supplementary Table 6</b>   | Effect of RNAi-mediated TF knock-down on eye development                                          |
| <b>Supplementary Data</b>      | PWMs used for binding site predictions.                                                           |

*Note: Supplementary Tables 1 and 3 are available on the Nature Methods website.*

## Supplementary Figures

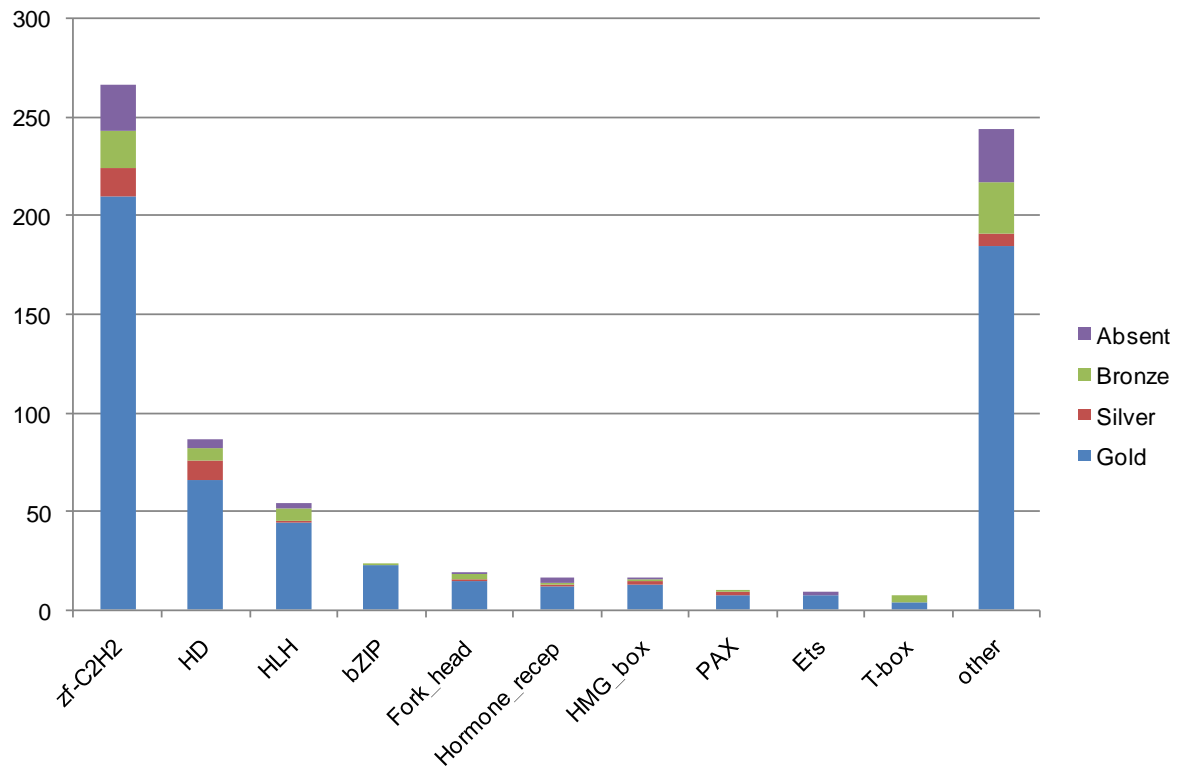

**Supplementary Figure 1** | Distribution of DNA-binding protein domains within the *Drosophila* TF repertoire and the quality of the obtained TF ORF clone: Gold (blue), silver (orange), bronze (green). The TFs for which no TF ORF clone was obtained are indicated in purple. For explanation about the quality scores, we refer to the **Online Methods** section.

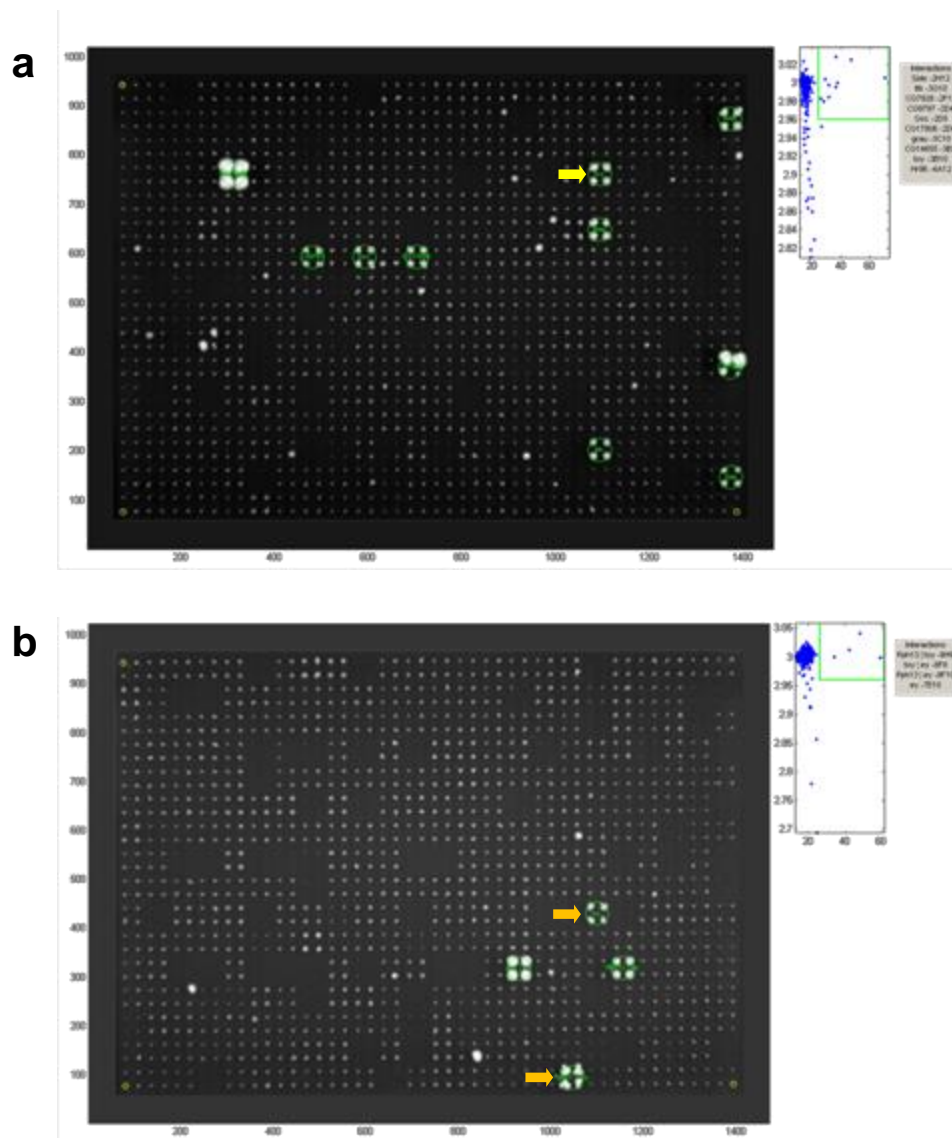

**Supplementary Figure 2** | Interactions observed with the *so10* bait upon growth on a selective plate containing 10 mM 3-AT. One representative replicate is shown. **(a)** Interactions after transformation with the first 384-well TF plate. **(b)** Interactions after transformation with the second 384-well TF plate. The yellow and orange arrows point to yeast colonies containing respectively TOY and EY, the two positive control TFs.

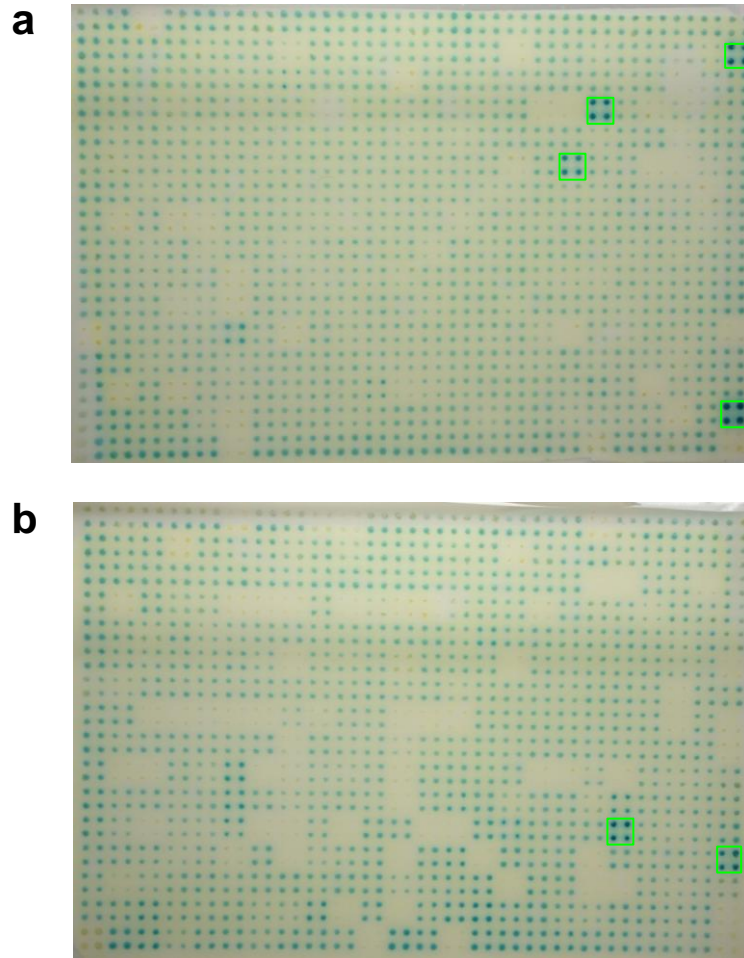

**Supplementary Figure 3** | Interactions observed with the *so10* bait using the *lacZ* reporter. **(a)** Interactions after transformation with the first 384-well TF plate. **(b)** Interactions after transformation with the second 384-well TF plate. The green squares indicate yeast colonies that were considered positive for X-gal staining. The identities of the positive interactions are listed in **Supplementary Table 2**.

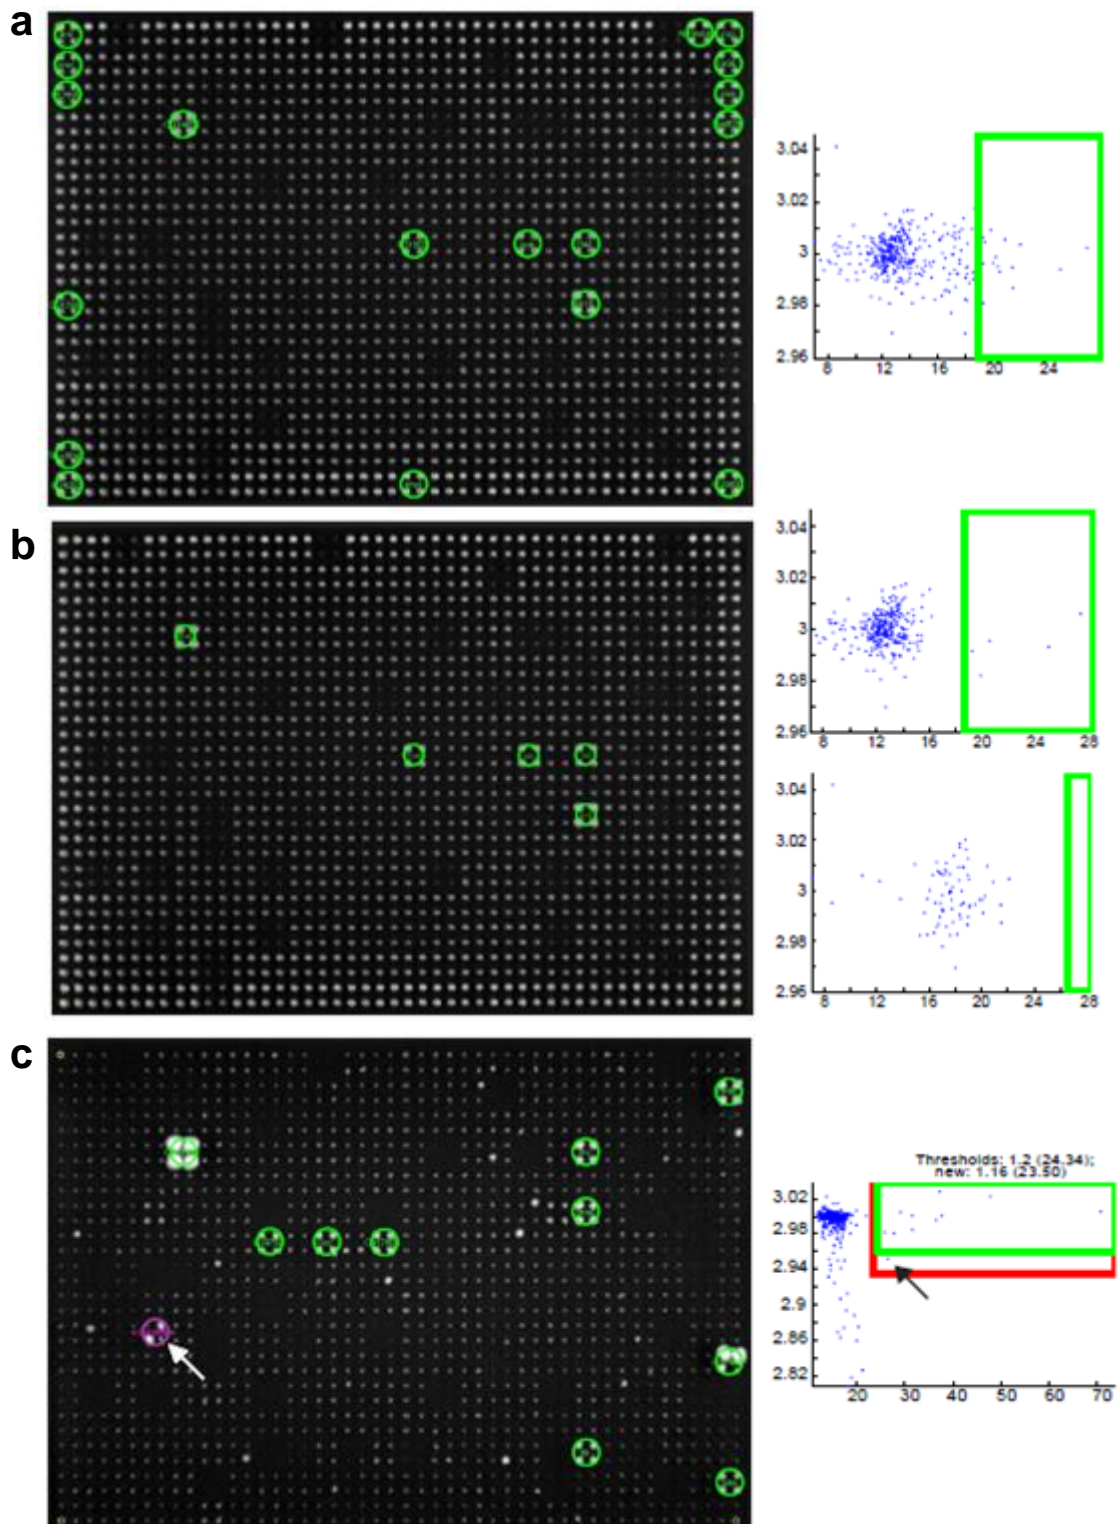

**Supplementary Figure 4** | Output of the TIDY program. Interactions identified by TIDY are indicated by a green circle on the analyzed plate image. The quadruplicated yeast colony patterns are detected by convoluting the image with a pattern of four bright spots on a dark background. The intensity value of the convoluted image is measured in the center of each quadrant. These values are

plotted for each quadrant on the x-axis of a plot next to the picture. Greater values indicate stronger interactions. On the Y-axis of this plot, a uniformity coefficient is computed for each TF. A number close to 3 indicates little variation in intensity between the four colonies of a quadruplet whereas a number that deviates from 3 indicates heterogeneous growth of individual quadrant colonies. **(a)** Yeast colonies on the border of the plate often grow faster than those in the middle, which may lead to the erroneous detection of such border colonies as positives. **(b)** A separate background normalization for border colonies avoids this issue. **(c)** The default threshold can be adjusted to evaluate the detection stringency. Interactions (indicated with an arrow) that are detected when lowering either the intensity or uniformity threshold are indicated in magenta and are considered “weak”.



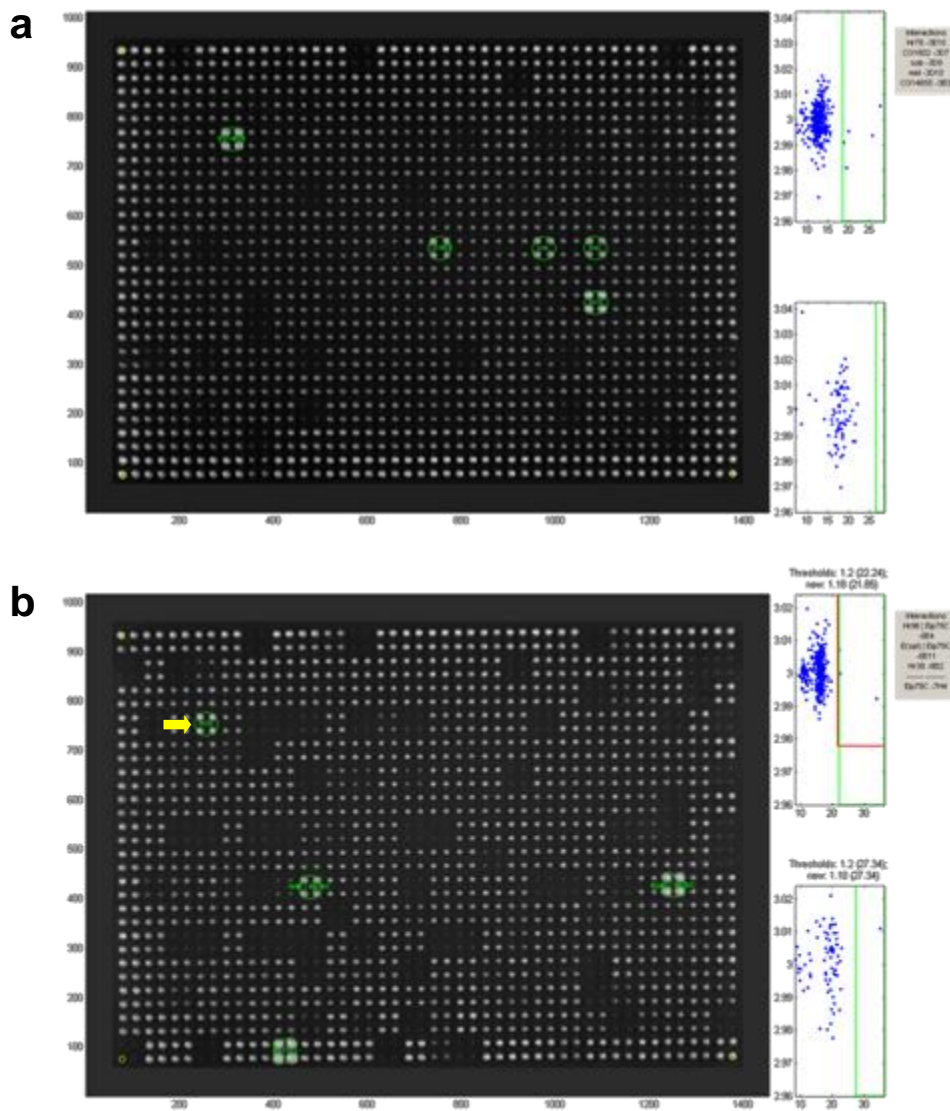

**Supplementary Figure 5** | Interactions observed with the *ng-EcRE* bait upon growth on a selective plate containing 20 mM 3-AT. One representative replicate is shown. **(a)** Interactions after transformation with the first 384-well TF plate. **(b)** Interactions after transformation with the second 384-well TF plate. The yellow arrow points to yeast colonies containing Hr38, the positive control TF.

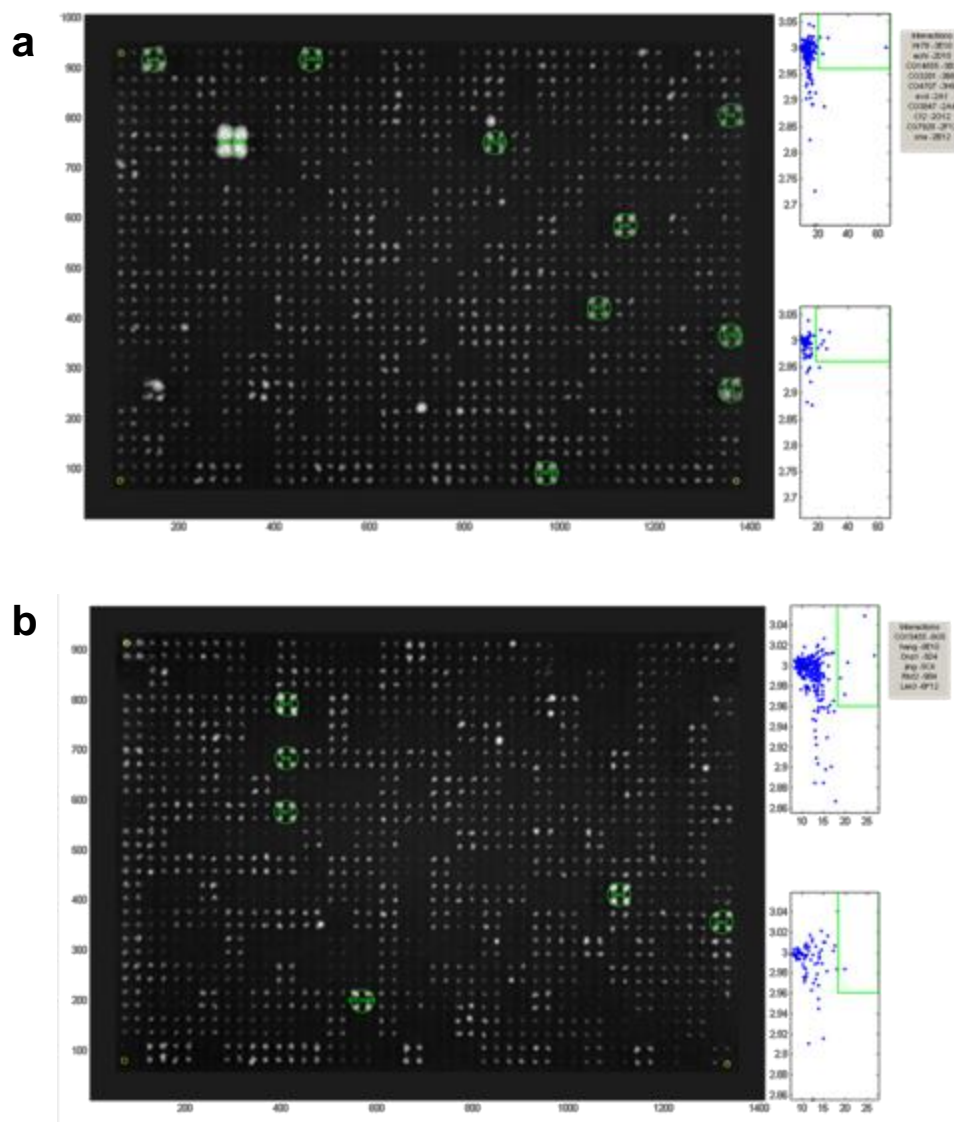

**Supplementary Figure 6** | Interactions observed with the *eve-stripe2* bait upon growth on a selective plate containing 40 mM 3-AT. One representative replicate is shown. **(a)** Interactions after transformation with the first 384-well TF plate. **(b)** Interactions after transformation with the second 384-well TF plate.



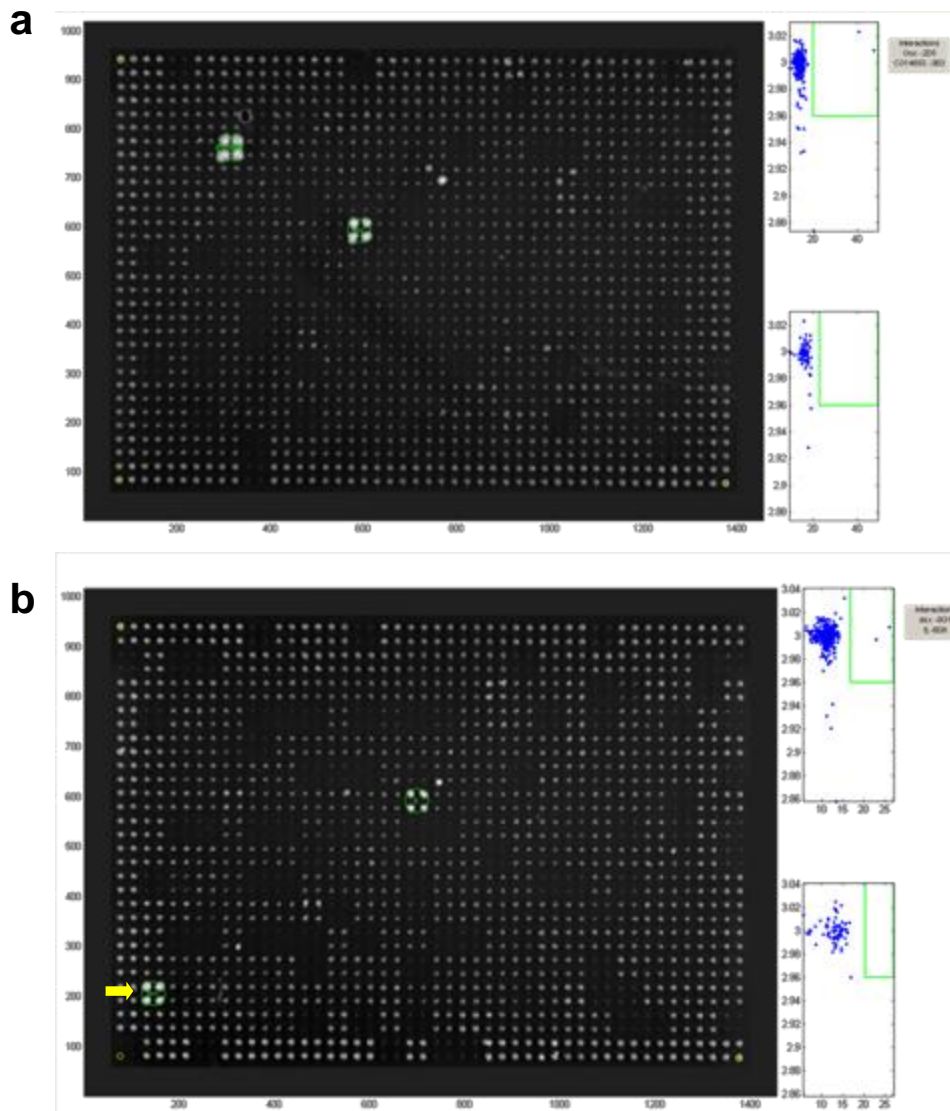

**Supplementary Figure 7** | Interactions observed with the *yp1-1* bait upon growth on a selective plate containing 20 mM 3-AT. One representative replicate is shown. **(a)** Interactions after transformation with the first 384-well TF plate. **(b)** Interactions after transformation with the second 384-well TF plate. The yellow arrow points to yeast colonies containing DSX, the positive control TF.

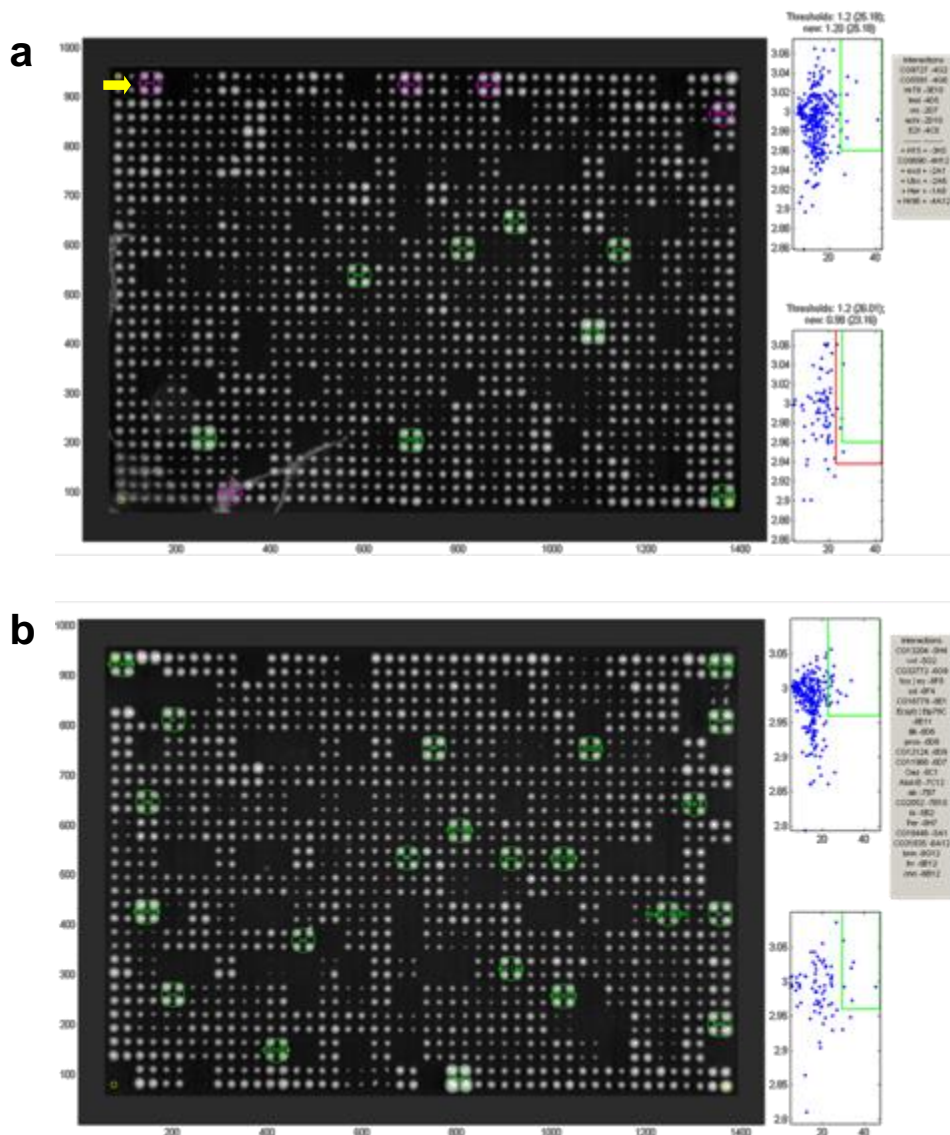

**Supplementary Figure 8** | Interactions observed with the *dpp813* bait upon growth on a selective plate containing 20 mM 3-AT. One representative replicate is shown. **(a)** Interactions after transformation with the first 384-well TF plate. **(b)** Interactions after transformation with the second 384-well TF plate. The yellow arrow points to yeast colonies containing EXD, the positive control TF.

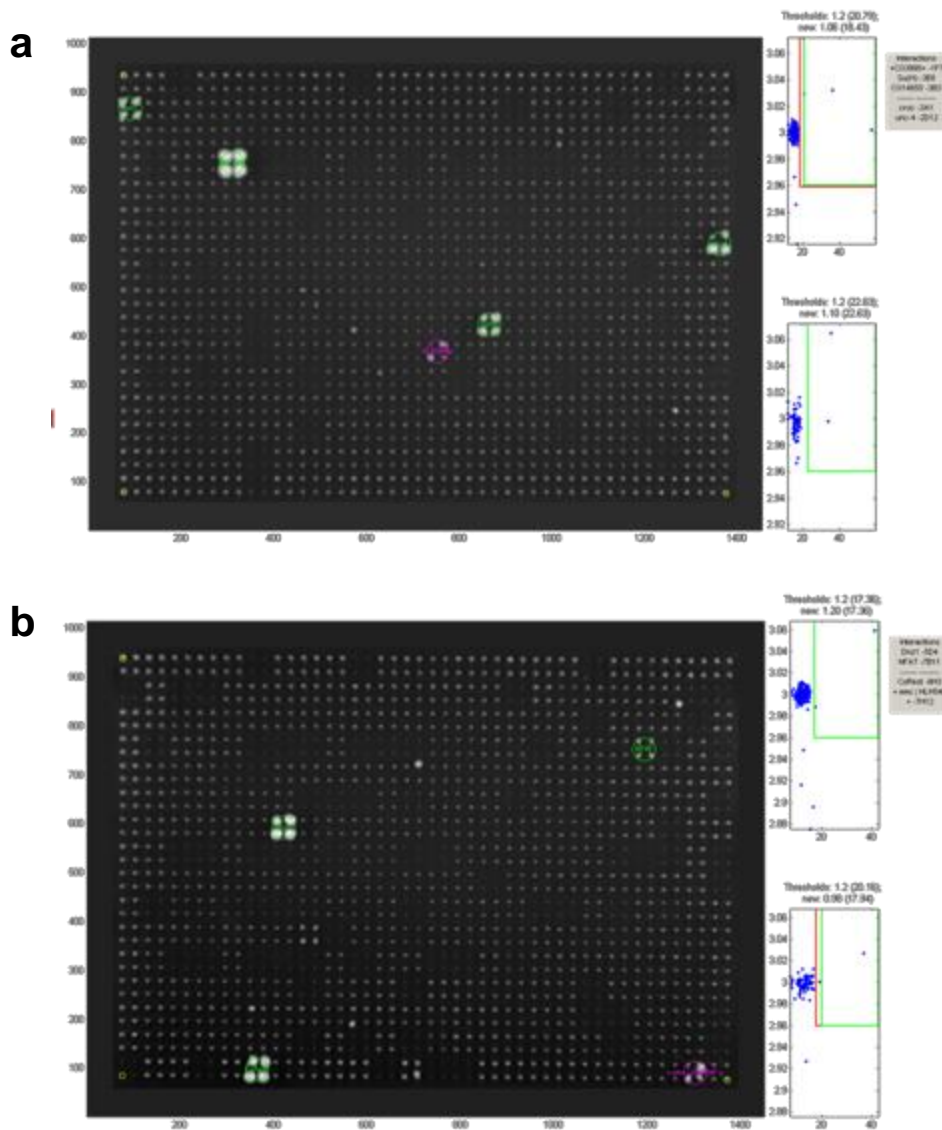

**Supplementary Figure 9** | Interactions observed with the *EF3418* bait upon growth on a selective plate containing 20 mM 3-AT. One representative replicate is shown. **(a)** Interactions after transformation with the first 384-well TF plate. **(b)** Interactions after transformation with the second 384-well TF plate.

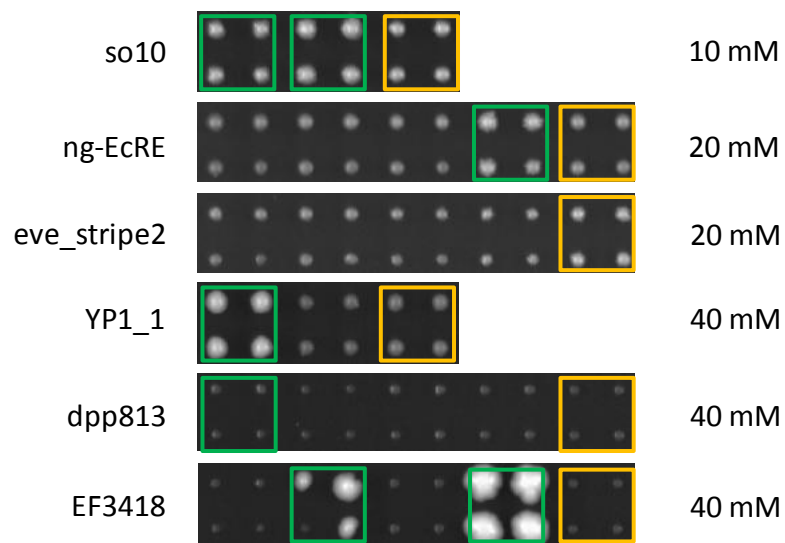

**Supplementary Figure 10** | Manual screen of positive control interactions. Negative controls (empty pAD-DEST vector) are indicated with yellow boxes. The green squares indicate yeast colonies that were considered positive. Bait names are indicated on the left. Tested TFs are listed in **Supplementary Table 4**. 3-AT concentrations of the selective plates are indicated on the right

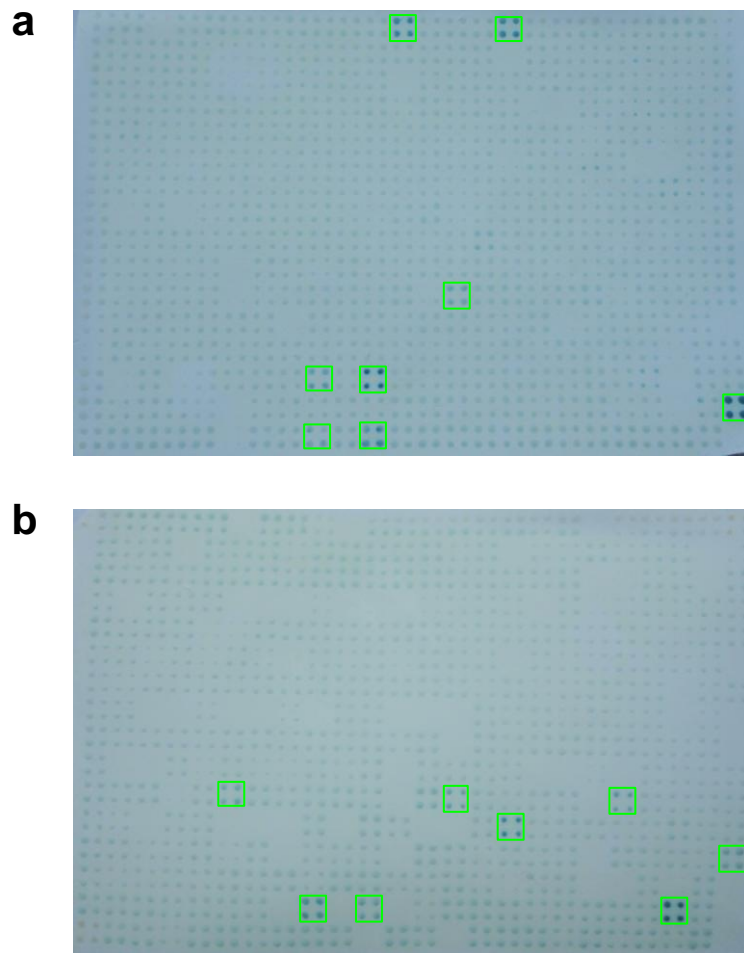

**Supplementary Figure 11** | Interactions observed with the *dpp813* bait using the *lacZ* reporter. **(a)** Interactions after transformation with the first 384-well TF plate. **(b)** Interactions after transformation with the second 384-well TF plate. The green squares indicate yeast colonies that were considered positive for X-gal staining. The identities of the positive interactions are listed in **Supplementary Table 2**.

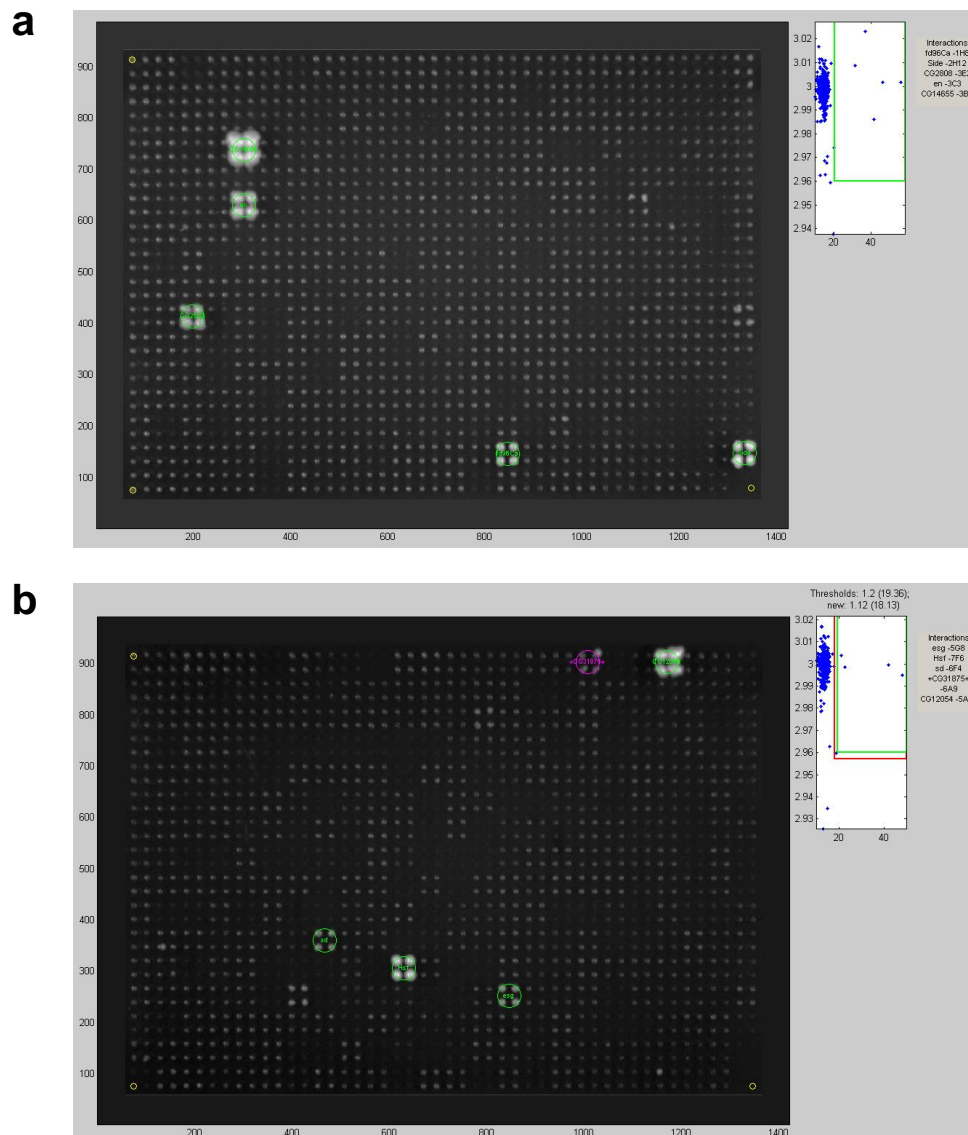

**Supplementary Figure 12** | Interactions observed with the *dpp813-Frag1* bait upon growth on a selective plate containing 20 mM 3-AT. One representative replicate is shown. **(a)** Interactions after transformation with the first 384-well TF plate. **(b)** Interactions after transformation with the second 384-well TF plate.



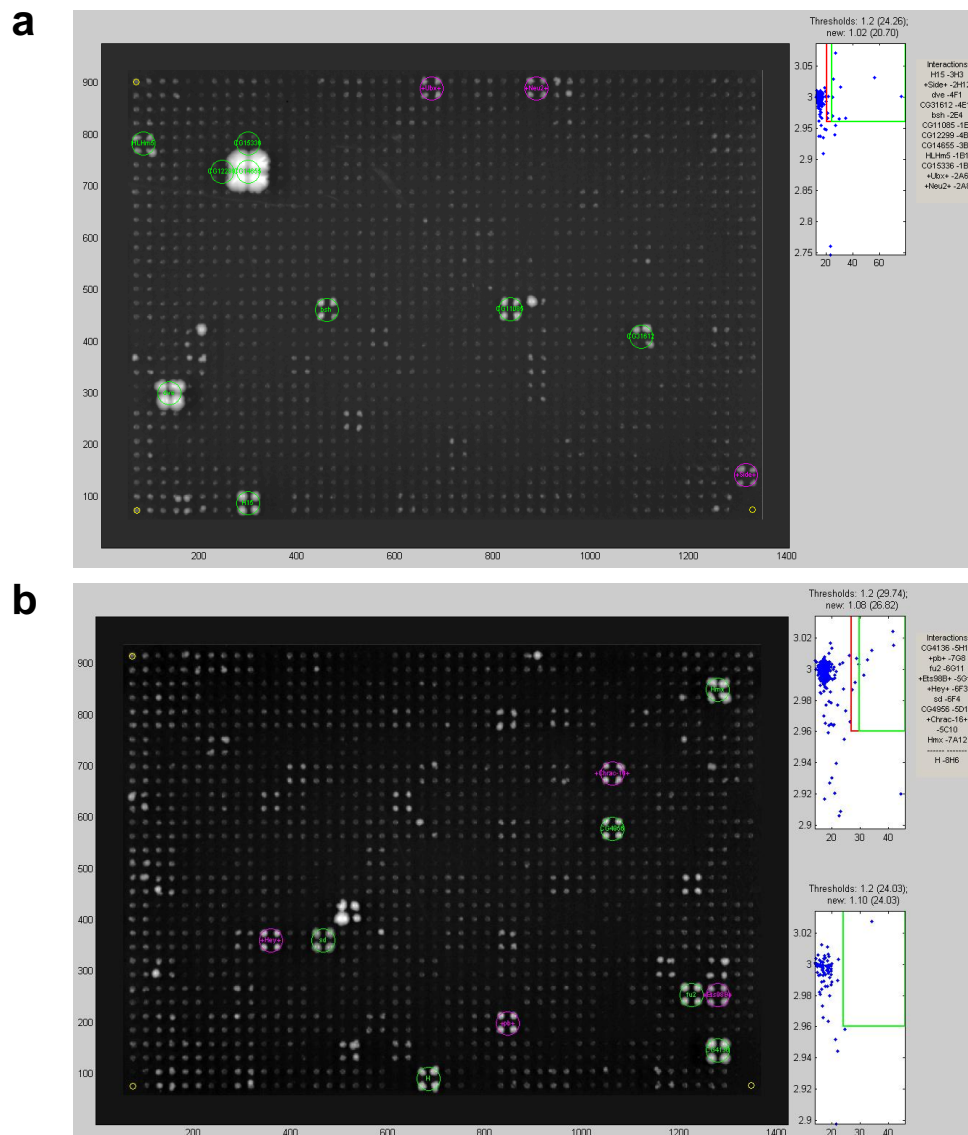

**Supplementary Figure 13** | Interactions observed with the *dpp813-Frag2* bait upon growth on a selective plate containing 10 mM 3-AT. One representative replicate is shown. **(a)** Interactions after transformation with the first 384-well TF plate. **(b)** Interactions after transformation with the second 384-well TF plate. Interestingly, two out of three interactions found in both replicates and seven out of 30 in single screens (including both positive control interactions) were found at least once with the full-length *dpp813* element or the *dpp813-RC* element, indicating that this fragment is likely the major contributor of the observed protein-DNA interactions with the full-length *dpp813* element

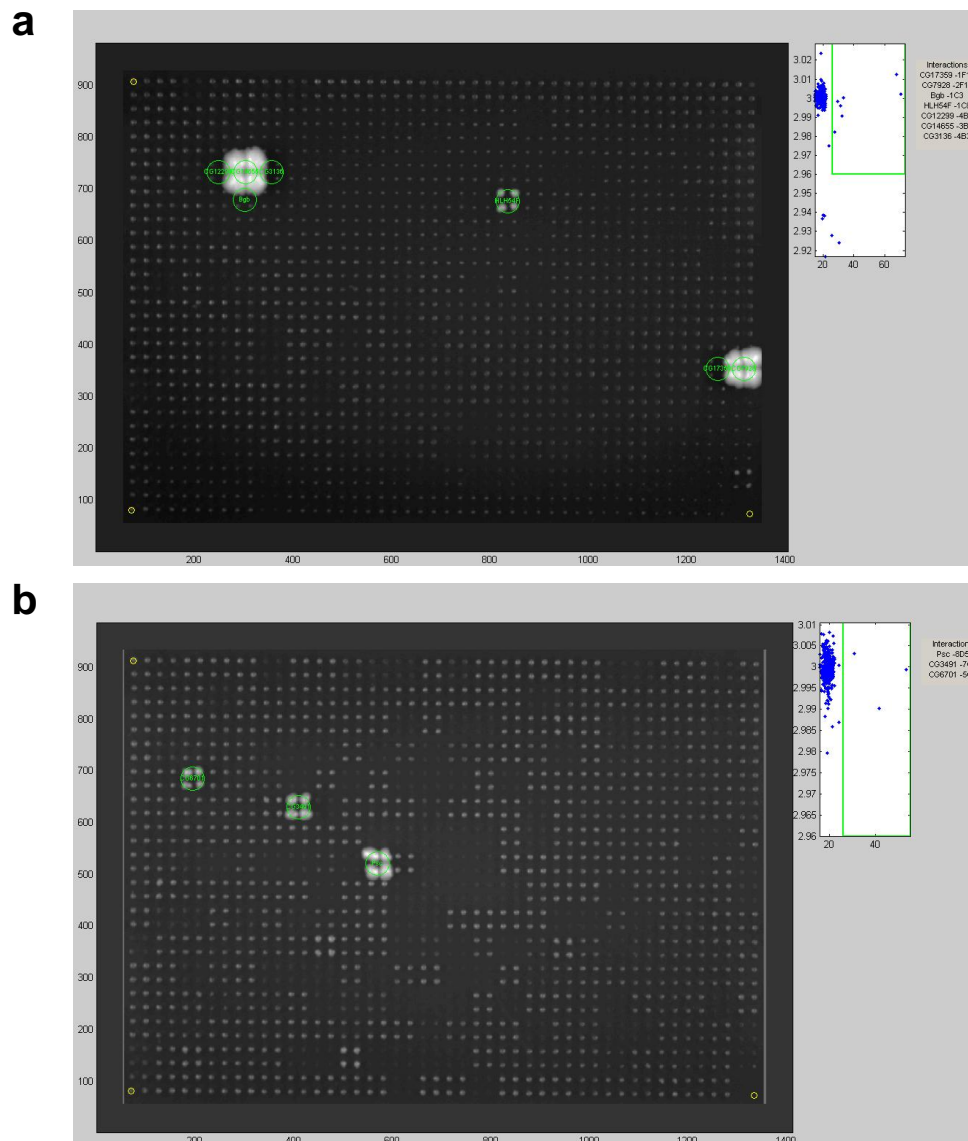

**Supplementary Figure 14** | Interactions observed with the *dpp813-Frag3* bait upon growth on a selective plate containing 10 mM 3-AT. One representative replicate is shown. **(a)** Interactions after transformation with the first 384-well TF plate. **(b)** Interactions after transformation with the second 384-well TF plate.

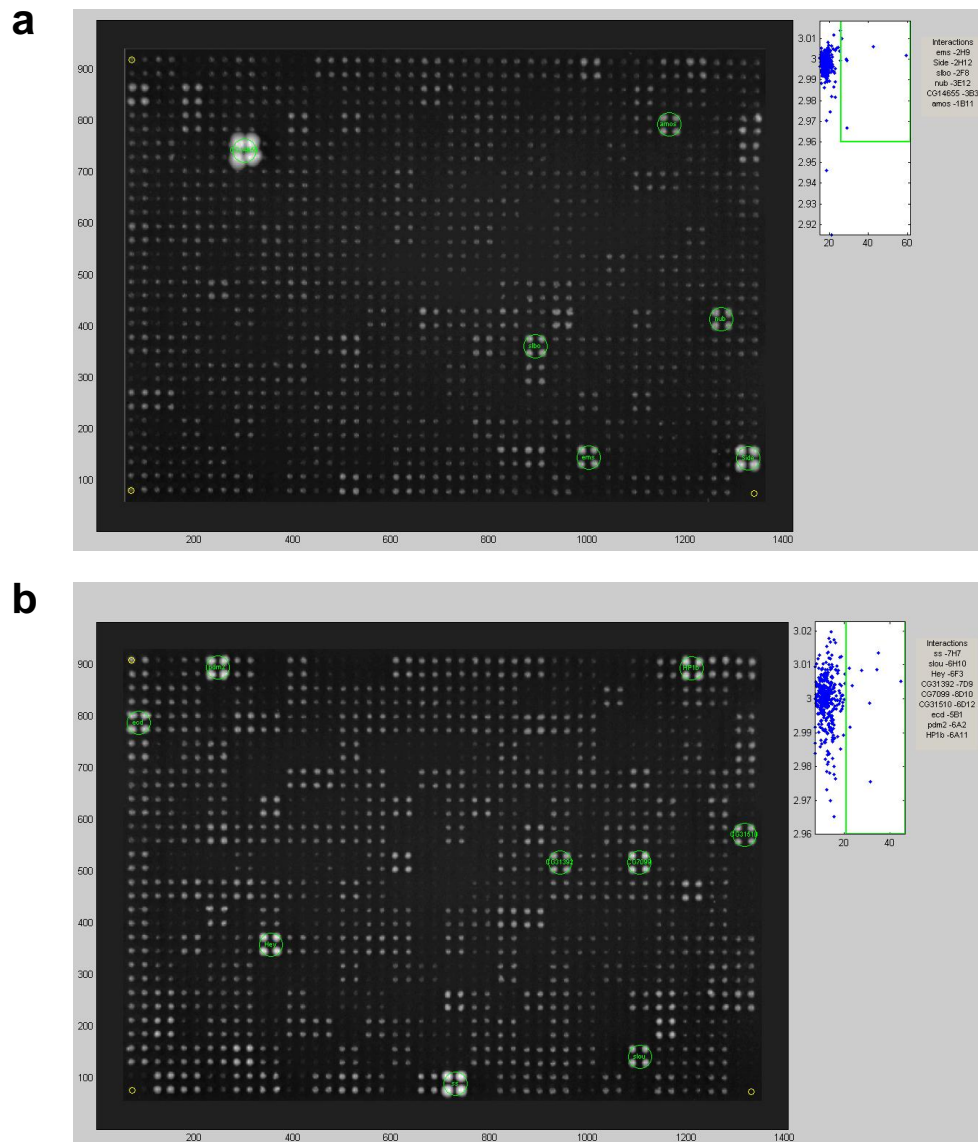

**Supplementary Figure 15** | Interactions observed with the *dpp813-RC* bait upon growth on a selective plate containing 10 mM 3-AT. One representative replicate is shown. **(a)** Interactions after transformation with the first 384-well TF plate. **(b)** Interactions after transformation with the second 384-well TF plate.

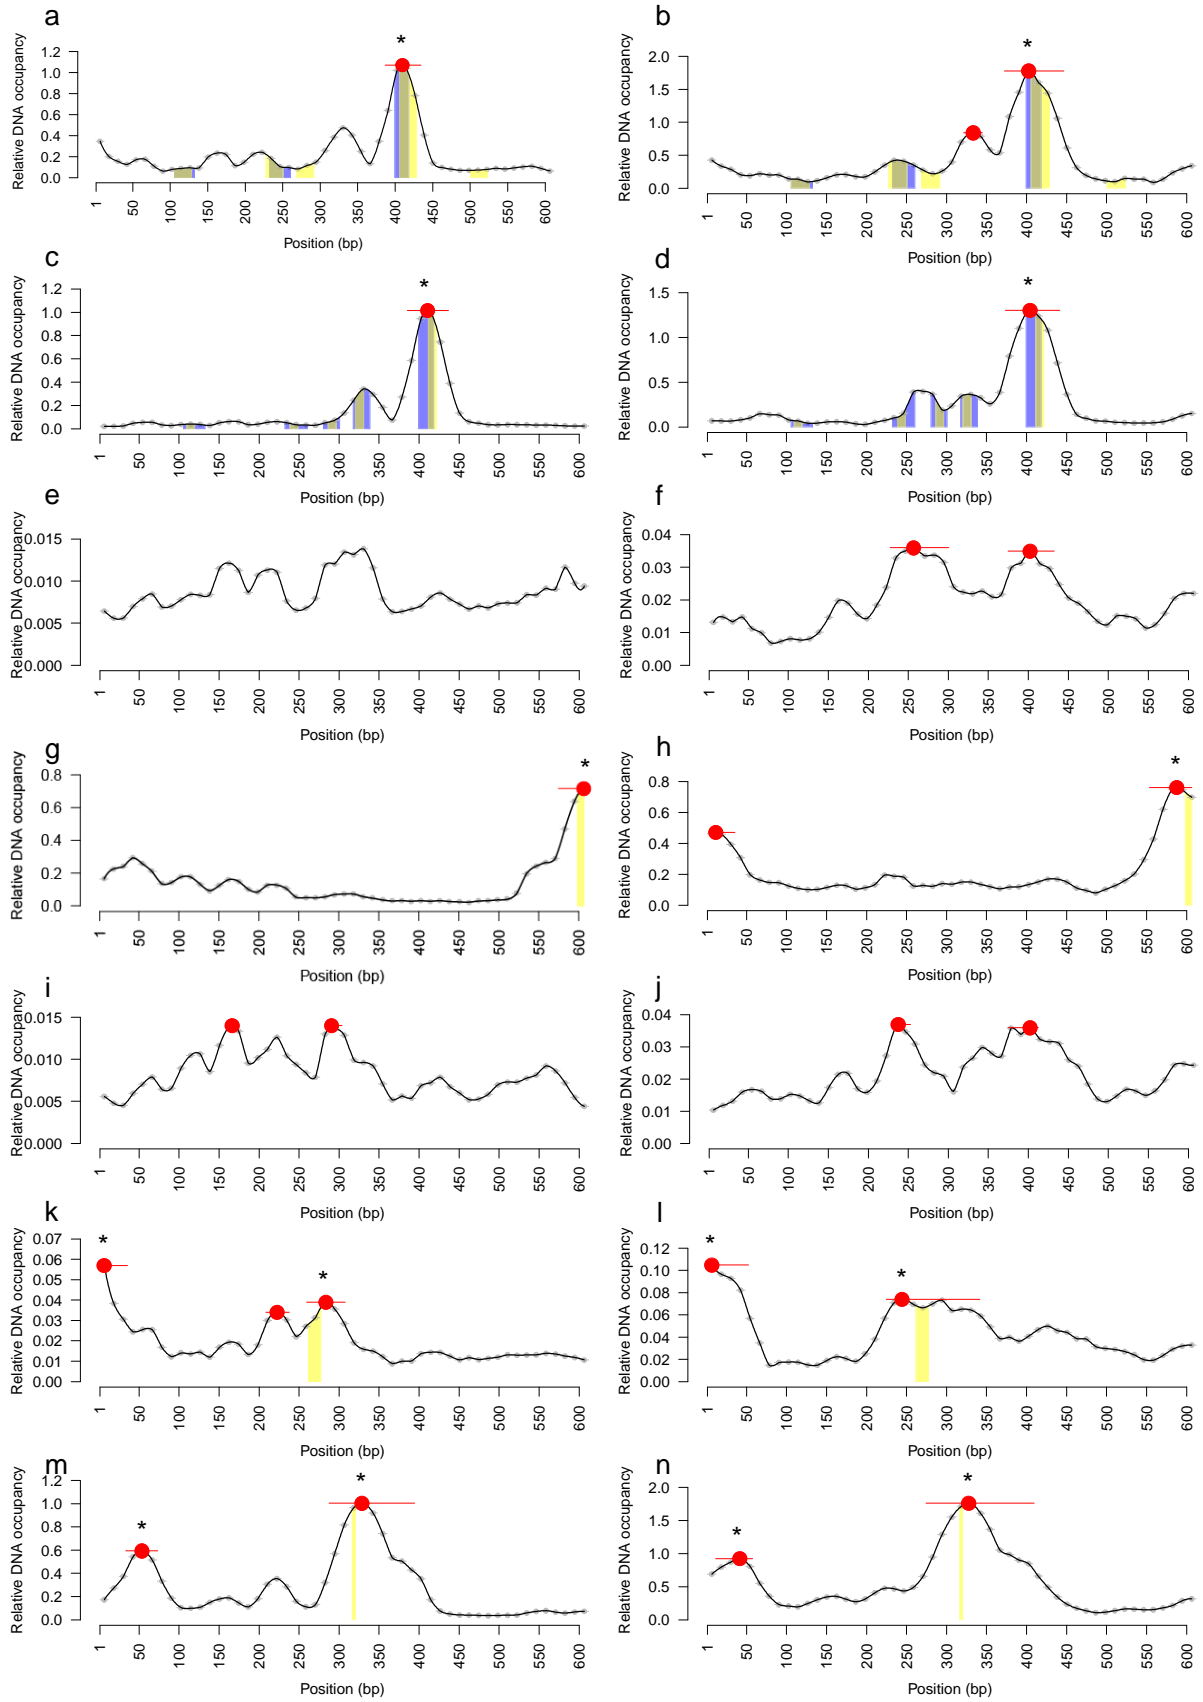

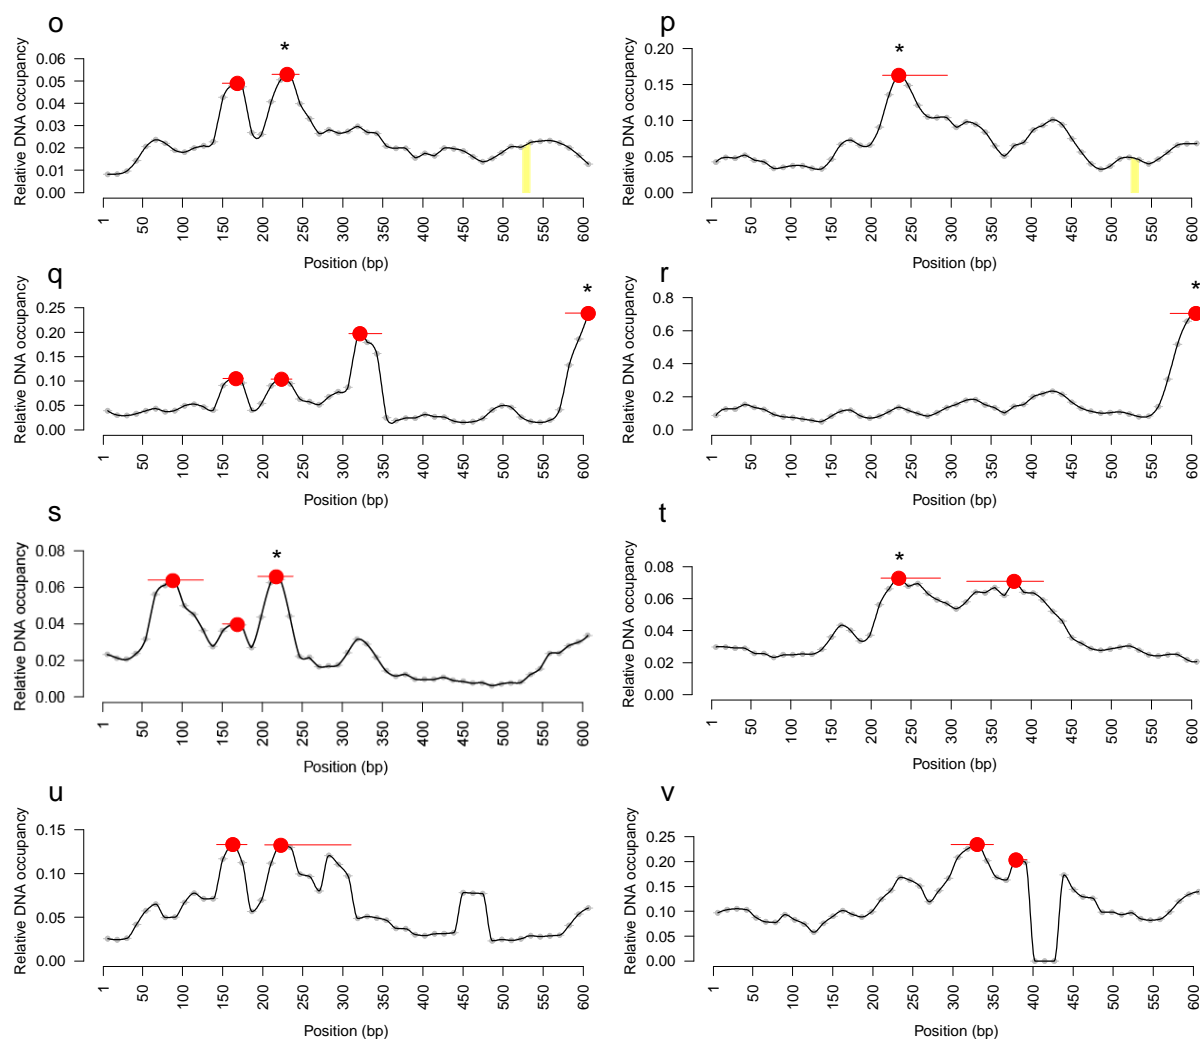

**Supplementary Figure 16** | MARE analysis of *so10* for recognition by Y1H-identified TFs in two replicates. For clarity, replicates that were represented in the main manuscript are recapitulated here. Bound DNA levels normalized over surface-immobilized protein amounts are plotted for each 12 bp nucleotide stretch and as an interpolated curve. Significant peaks are indicated with a red line, peak maxima are indicated with a red dot. Peaks found in both replicates are indicated with an asterisk. Where available, DNase I footprinting data and PWM-based binding site predictions are indicated with blue and yellow bars respectively. Overlapping DNase I footprinting data and PWM-based binding site predictions are indicated with grey bars. (a-b) EY. (c-d) TOY. (e-f) CG9797 (g-h) TTK. (i-j) CG17806. (k-l) CG7928. (m-n) GSC. (o-p) SIDE. (q-r) HR39. (s-t) GRAU. (u-v) HR96.

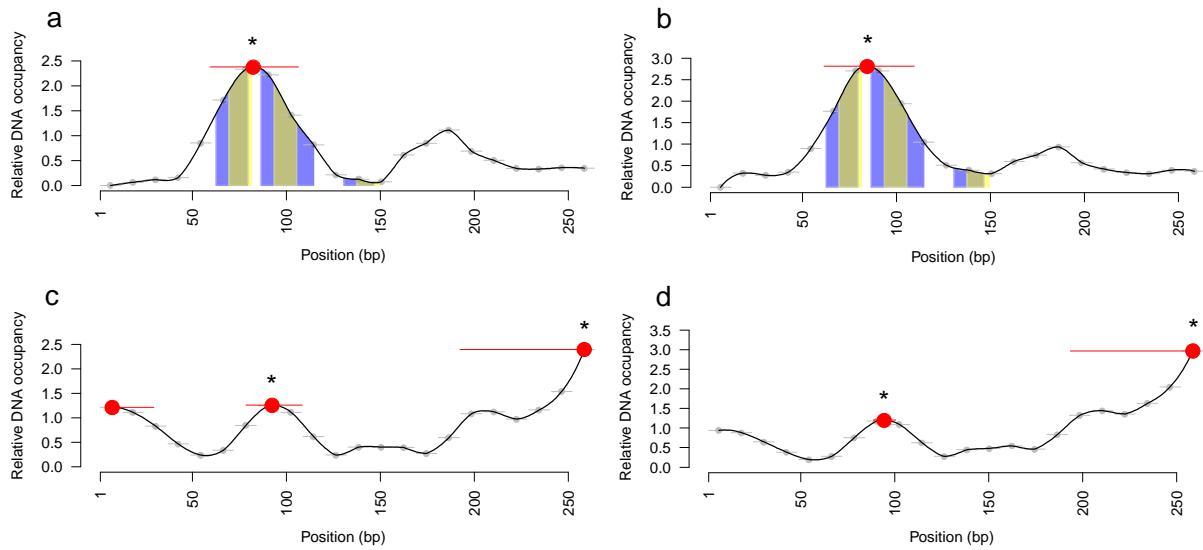

**Supplementary Figure 17** | MARE analysis of *yp1-1* for recognition by Y1H-identified TFs in two replicates. For clarity, replicates that were represented in the main manuscript are recapitulated here. Bound DNA levels normalized over surface-immobilized protein amounts are plotted for each 12 bp nucleotide stretch and as an interpolated curve. Significant peaks are indicated with a red line, peak maxima are indicated with a red dot. Peaks found in both replicates are indicated with an asterisk. Where available, DNase I footprinting data and PWM-based binding site predictions are indicated with blue and yellow bars respectively. Overlapping DNase I footprinting data and PWM-based binding site predictions are indicated with grey bars. **(a-b)** DSX. **(c-d)** TJ.



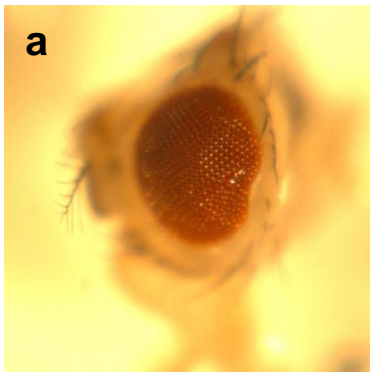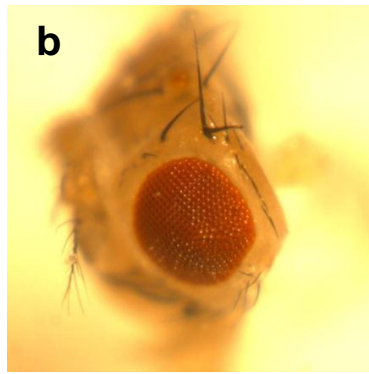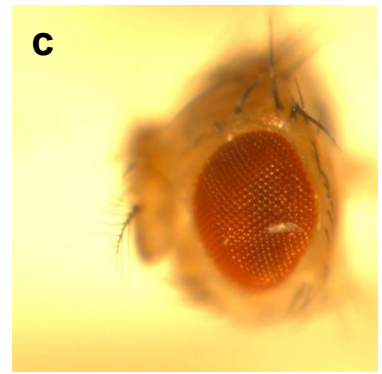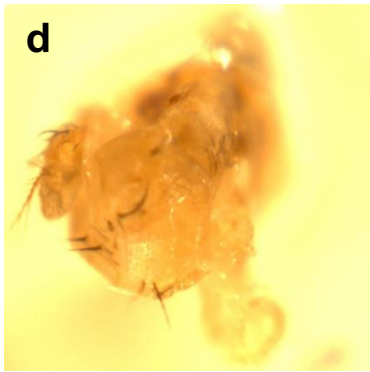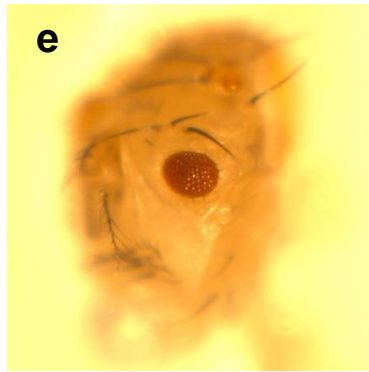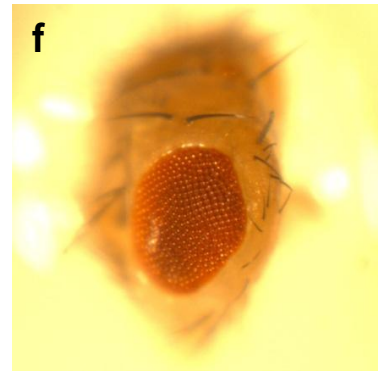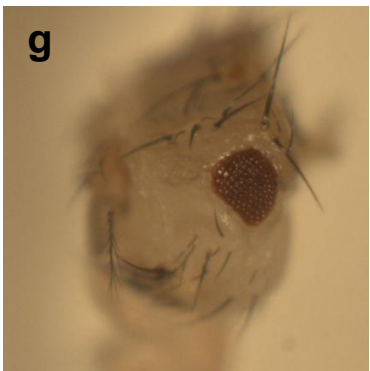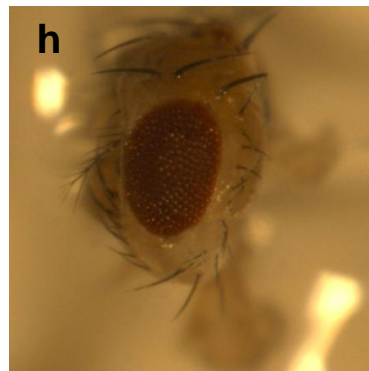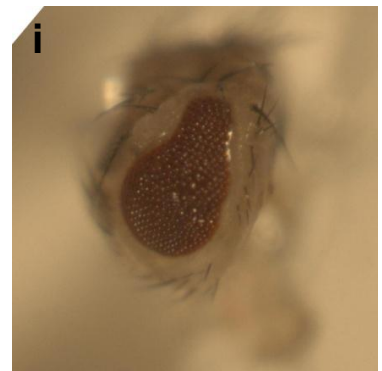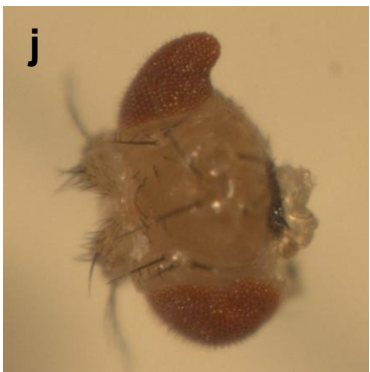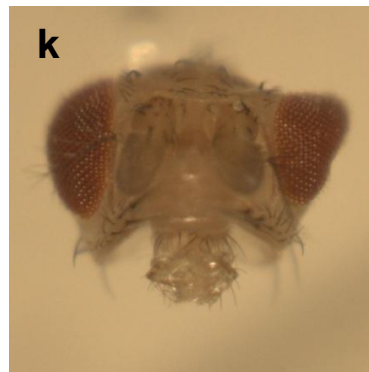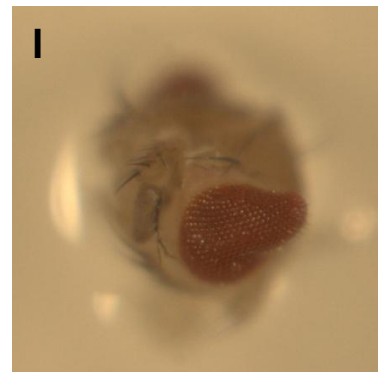

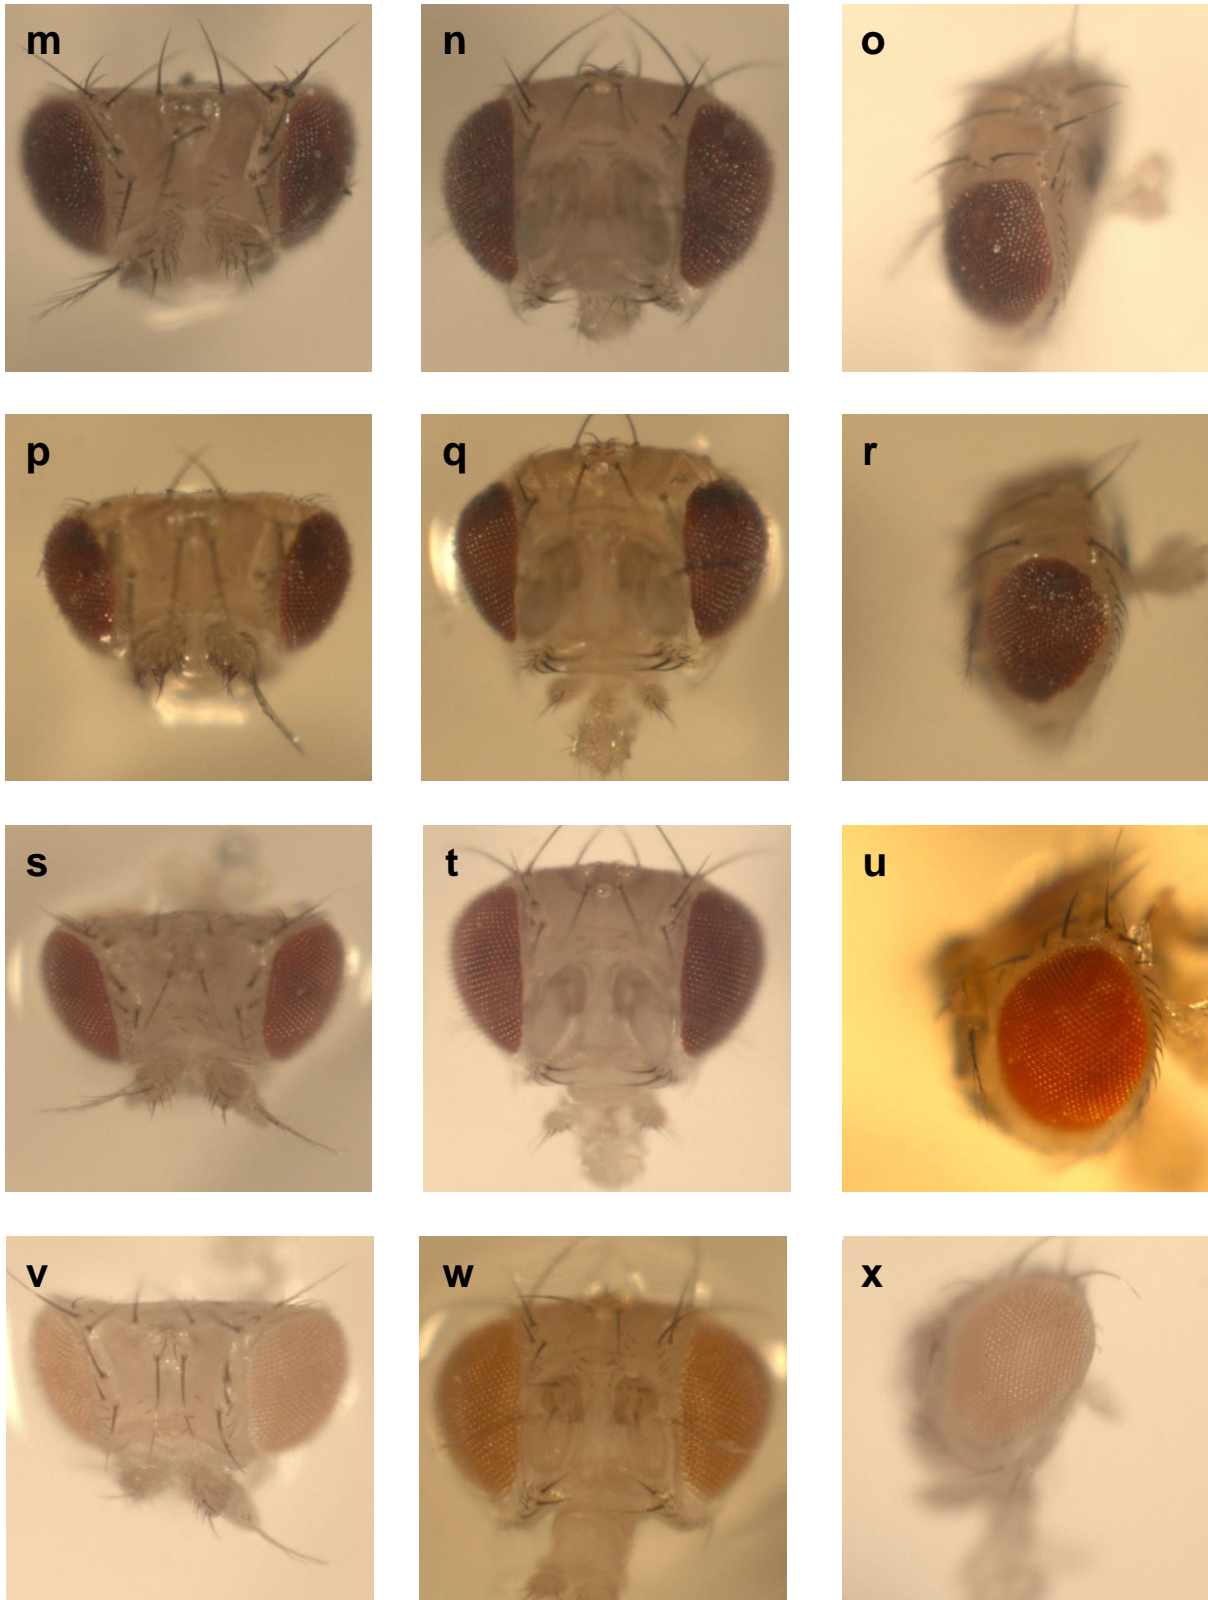

**Supplementary Figure 18** | Eye phenotypes observed after RNAi-mediated knock-down of TFs identified in Y1H. For lateral views, anterior is to the left, dorsal is to the top. **(a-c)** OK107>ey-RNAi<sub>TRIP</sub>, lateral view. **(d-f)** so10>ey-RNAi<sub>TRIP</sub>, lateral view. **(g-i)**

*OK107>CG9797-RNAi<sub>TRIP</sub>*, lateral view. (**j-l**) *so10>CG9797-RNAi<sub>VDRC</sub>*; (**j**) Dorsal view, (**k**) Frontal view (**l**) lateral view. (**m-o**) *OK107>ttk-RNAi<sub>VDRC</sub>*; (**m**) Dorsal view, (**n**) Frontal view (**o**) lateral view. (**p-r**) *so10>ttk-RNAi<sub>VDRC</sub>*; (**p**) Dorsal view, (**q**) Frontal view (**r**) lateral view. (**s-u**) *OK107>gfp*; (**s**) Dorsal view, (**t**) Frontal view (**u**) lateral view. (**v-x**) *so10>gfp*; (**v**) Dorsal view, (**w**) Frontal view (**x**) lateral view.

## Supplementary Table 2: Observed interactions in two independent screens

|                    |                  |                                           |
|--------------------|------------------|-------------------------------------------|
| Strong interaction | Weak interaction | LacZ positives found in both HIS3 screens |
|--------------------|------------------|-------------------------------------------|

| <b>so10</b> |          |         |        |
|-------------|----------|---------|--------|
| Screen 1    | Screen 2 | overlap | LacZ   |
| CG9797      | CG9797   | CG9797  | ey     |
| CG17806     | CG17806  | CG17806 | Hr39   |
| CG7928      | CG7928   | CG7928  | Hr96   |
| ey          | ey       | ey      | Side   |
| gce         | grau     | grau    | toy    |
| grau        | Gsc      | Gsc     | CG4496 |
| Gsc         | Hr39     | Hr39    |        |
| Hr39        | Hr96     | Hr96    |        |
| Hr96        | Side     | Side    |        |
| lz          | toy      | toy     |        |
| Side        | ttk      | ttk     |        |
| toy         |          |         |        |
| ttk         |          |         |        |

| <b>ng-EcRE</b> |          |         |
|----------------|----------|---------|
| Screen 1       | Screen 2 | Overlap |
| CG1602         | btd      | CG1602  |
| chn            | CG1602   | Eip78C  |
| CrebA          | CG17568  | Hr38    |
| Eip78C         | Eip78C   | Hr78    |
| Hr38           | Hr38     | mid     |
| Hr78           | Hr78     | sob     |
| mid            | mid      |         |
| sob            | sob      |         |

| <b>eve_stripe2</b> |          |         |
|--------------------|----------|---------|
| Screen 1           | Screen 2 | Overlap |
| 40mM               | 40mM     |         |
| CG11456            | achi     | CG7928  |
| CG32830            | Cf2      | exd     |
| CG7928             | CG15455  | Hr78    |
| CG9890             | CG3281   | sna     |
| dimm               | CG3847   |         |
| exd                | CG4707   |         |
| Hr78               | CG7928   |         |
| sd                 | Dnz1     |         |
| sna                | exd      |         |
| sug                | hang     |         |
| Trf                | Hr78     |         |

|       |      |  |
|-------|------|--|
| unc-4 | jing |  |
|       | Lim3 |  |
|       | Rbf2 |  |
|       | sna  |  |

| <b>yp1-1</b> |          |         |
|--------------|----------|---------|
| Screen 1     | Screen 2 | Overlap |
| dsx          | dsx      | dsx     |
| sd           | Gsc      | tj      |
| tj           | tj       |         |

| <b>dpp813</b> |             |         |         |
|---------------|-------------|---------|---------|
| Screen 1      | Screen 2    | Overlap | LacZ    |
| ab            | ac          | E(spl)  | ubx     |
| Abd-B         | CG11676     | E2f     | ey      |
| achi          | CG13424     | Eip78C  | toy     |
| bi            | CG16801     | ubx     | Neu2    |
| CG11966       | CG18011     | ey      | toe     |
| CG12124       | CG31612     | toy     | CG11696 |
| CG13204       | CG6276      |         | Dek     |
| CG16779       | CG8359      |         | CG13123 |
| CG18446       | CG8478      |         | side    |
| CG2052        | D           |         | hey     |
| CG31835       | Dif         |         | lbe     |
| CG32772       | drm         |         | gcm     |
| CG5591        | E(spl)      |         | CG4496  |
| CG9727        | E2f         |         | eyg     |
| CG9890        | Eip78C      |         | opa     |
| chn           | ey          |         | pnt     |
| E(spl)        | kn          |         |         |
| E2f           | l(1)sc      |         |         |
| Eip78C        | Neu2        |         |         |
| exd           | peb         |         |         |
| ey            | Rel         |         |         |
| H15           | retn        |         |         |
| Her           | sim         |         |         |
| Hr78          | Su(var)2-10 |         |         |
| Hr96          | sv          |         |         |
| lilli         | tgo         |         |         |
| lmd           | toy         |         |         |
| Oaz           | trh         |         |         |
| pros          | Ubx         |         |         |
| sd            | wor         |         |         |
| toy           |             |         |         |
| trr           |             |         |         |
| Ubx           |             |         |         |
| vis           |             |         |         |
| vvl           |             |         |         |

| <b>EF3418</b>   |                 |                |
|-----------------|-----------------|----------------|
| <b>Screen 1</b> | <b>Screen 2</b> | <b>Overlap</b> |
| 40 mM           | 40 mM           |                |
| CG3995          | CG4854          | croc           |
| unc-4           | ac              | NFAT           |
| croc            | TFAM            |                |
| Su(H)           | bsh             |                |
| Dnz1            | croc            |                |
| NFAT            | CG3726          |                |
| emc             | pita            |                |
| HLH54F          | Lhr             |                |
|                 | CG18446         |                |
|                 | cbt             |                |
|                 | sd              |                |
|                 | E5              |                |
|                 | NFAT            |                |
|                 | Mnf             |                |
|                 | CG1244          |                |



## Supplementary Table 4: manual screening of reported interactions

| <b>so10</b> | reported interacting TF | HT Y1H | manual Y1H |
|-------------|-------------------------|--------|------------|
|             | ey                      | ok     | ok         |
|             | toy                     | ok     | ok         |

| <b>ng-EcRE</b> | reported interacting TF | HT Y1H | manual Y1H |
|----------------|-------------------------|--------|------------|
|                | Usp                     |        |            |
|                | EcR                     |        |            |
|                | Hr39                    |        |            |
|                | Hr38                    | ok     | ok         |

| <b>eve_stripe2</b> | reported interacting TF | HT Y1H | manual Y1H |
|--------------------|-------------------------|--------|------------|
|                    | bcd                     |        |            |
|                    | hb                      |        |            |
|                    | Kr                      |        |            |
|                    | gt                      |        |            |

| <b>yp1_1</b> | reported interacting TF | HT Y1H | manual Y1H |
|--------------|-------------------------|--------|------------|
|              | dsx                     | ok     | ok         |
|              | Aef1                    |        |            |

| <b>dpp813</b> | reported interacting TF | HT Y1H | manual Y1H |
|---------------|-------------------------|--------|------------|
| 2A6           | Ubx                     | ok     | ok         |
| 3H10          | bin                     |        |            |
| 1F10          | abd-A                   |        |            |
| 2A1           | exd                     | 1/2    |            |

| <b>EF3418</b> | reported interacting TF | HT Y1H | manual Y1H |
|---------------|-------------------------|--------|------------|
| 8G6           | tin                     |        |            |
| 3H10          | bin                     |        | ok         |
| 2A9           | bap                     |        |            |
| 1B8           | mef2                    |        | ok         |

## Supplementary Table 5: *dpp813-Frag1-3* and *dpp813-RC* interactions

Strong interaction
Weak interaction
interaction found in full-length *dpp813*
interaction found in full-length *dpp813-RC*

| <b><i>dpp813-Frag1</i></b> |          |         |
|----------------------------|----------|---------|
| Screen 1                   | Screen 2 | Overlap |
| fd96Ca                     | fd96Ca   | fd96Ca  |
| Side                       | Side     | Side    |
| CG2808                     | CG7928   | sd      |
| en                         | CG11971  | CG31875 |
| esg                        | Jra      |         |
| Hsf                        | Her      |         |
| sd                         | CG15073  |         |
| CG31875                    | fd59A    |         |
| CG12054                    | sd       |         |
|                            | Doc1     |         |
|                            | CG31875  |         |
|                            |          |         |
|                            |          |         |
|                            |          |         |

| <b><i>dpp813-Frag2</i></b> |          |         |
|----------------------------|----------|---------|
| Screen 1                   | Screen 2 | Overlap |
| Side                       | H15      | Side    |
| slbo                       | Side     | Neu2    |
| Oli                        | dve      | ets98B  |
| exd                        | CG31612  |         |
| Neu2                       | bsh      |         |
| sug                        | CG11085  |         |
| Rpd3                       | HLHm5    |         |
| CG10543                    | Ubx      |         |
| CG1620                     | Neu2     |         |
| CG6792                     | H        |         |
| CG15455                    | CG4136   |         |
| Ets98B                     | pb       |         |
| CG12236                    | fu2      |         |
| CG17287                    | Ets98B   |         |
| CG8314                     | hey      |         |
| Mes4                       | sd       |         |
| CG18764                    | CG4956   |         |
| Alh                        | Chrac-16 |         |
|                            | Hmx      |         |

| <b>dpp813-Frag3</b> |          |         |
|---------------------|----------|---------|
| Screen 1            | Screen 2 | Overlap |
| CG7928              | cg       | Psc     |
| HLH54F              | Side     | CG6701  |
| Psc                 | CG14710  |         |
| CG3491              | Z4       |         |
| CG6701              | pnt      |         |
|                     | dsf      |         |
|                     | CG4496   |         |
|                     | CG34422  |         |
|                     | Psc      |         |
|                     | CG6701   |         |

| <b>dpp813-RC</b> |          |         |
|------------------|----------|---------|
| Screen 1         | Screen 2 | Overlap |
| ems              | cg       | Side    |
| Side             | Side     |         |
| slbo             | caup     |         |
| nub              | Dr       |         |
| amos             | maf-S    |         |
| ss               | CG9705   |         |
| slou             | pnt      |         |
| Hey              | Hand     |         |
| CG31392          |          |         |
| CG7099           |          |         |
| CG31510          |          |         |
| ecd              |          |         |
| pdm2             |          |         |
| HP1b             |          |         |

## Supplementary Table 6: Effect of RNAi-mediated TF knock-down on eye development

| UAS-RNAi line |              |                           |   | GAL4 driver line | Referred to in main text as       | eye phenotype                                   |
|---------------|--------------|---------------------------|---|------------------|-----------------------------------|-------------------------------------------------|
| stock #       | stock center | target gene               |   |                  |                                   |                                                 |
| 110498        | VDRC         | CG9797                    | x | OK107            | OK107>CG9797-RNAi <sub>VDRC</sub> | /                                               |
| 104319        | VDRC         | Gsc                       | x | OK107            |                                   | /                                               |
| 101592        | VDRC         | CG17806                   | x | OK107            |                                   | /                                               |
| 35290         | VDRC         | CG7928                    | x | OK107            |                                   | /                                               |
| 3066          | VDRC         | side                      | x | OK107            |                                   | /                                               |
| 110353        | VDRC         | toy                       | x | OK107            | OK107>toy-RNAi <sub>VDRC</sub>    | /                                               |
| 104196        | VDRC         | grau                      | x | OK107            |                                   | /                                               |
| 101980        | VDRC         | ttk                       | x | OK107            | OK107>ttk-RNAi <sub>VDRC</sub>    | rough eye                                       |
| 10958         | VDRC         | Hr96                      | x | OK107            |                                   | /                                               |
| 106628        | VDRC         | ey                        | x | OK107            | OK107>ey-RNAi <sub>VDRC</sub>     | /                                               |
| 60100         | VDRC         | /                         | x | OK107            | OK107>attP                        | /                                               |
| 32858         | TRiP         | CG9797                    | x | OK107            | OK107>CG9797-RNAi <sub>TRiP</sub> | rough eye, reduced eye field                    |
| 31956         | TRiP         | CG17806                   | x | OK107            |                                   | /                                               |
| 33679         | TRiP         | toy                       | x | OK107            | OK107>toy-RNAi <sub>TRiP</sub>    | /                                               |
| 32486         | TRiP         | ey                        | x | OK107            | OK107>ey-RNAi <sub>TRiP</sub>     | rough eye, reduced eye field                    |
| 27992         | TRiP         | Hr96                      | x | OK107            |                                   | /                                               |
| 33624         | TRiP         | Hr39                      | x | OK107            |                                   | /                                               |
| 26315         | TRiP         | ttk                       | x | OK107            | OK107>ttk-RNAi <sub>TRiP</sub>    | /                                               |
| 5130          | Bloomington  | mCD8::GFP<br>(expression) | x | OK107            | OK107>mCD8::GFP                   | /                                               |
| 110498        | VDRC         | CG9797                    | x | so10-GAL4        | so10>CG9797-RNAi <sub>VDRC</sub>  | reduced eye field, outgrowth of eye             |
| 104319        | VDRC         | Gsc                       | x | so10-GAL4        |                                   | /                                               |
| 101592        | VDRC         | CG17806                   | x | so10-GAL4        |                                   | /                                               |
| 35290         | VDRC         | CG7928                    | x | so10-GAL4        |                                   | slight deformation of eye edges, low penetrance |
| 3066          | VDRC         | side                      | x | so10-GAL4        |                                   | /                                               |
| 110353        | VDRC         | toy                       | x | so10-GAL4        | so10>toy-RNAi <sub>VDRC</sub>     | /                                               |

|        |             |                           |   |                  |                                |           |
|--------|-------------|---------------------------|---|------------------|--------------------------------|-----------|
| 104196 | VDRC        | grau                      | x | <i>so10-GAL4</i> |                                | /         |
| 101980 | VDRC        | ttk                       | x | <i>so10-GAL4</i> | <i>so10&gt;ttk-RNAiVDRC</i>    | rough eye |
| 10958  | VDRC        | Hr96                      | x | <i>so10-GAL4</i> |                                | /         |
| 106628 | VDRC        | ey                        | x | <i>so10-GAL4</i> | <i>so10&gt;ey-RNAiVDRC</i>     | /         |
| 60100  | VDRC        | /                         | x | <i>so10-GAL4</i> | <i>so10&gt;attP</i>            | /         |
| 32858  | TRiP        | CG9797                    | x | <i>so10-GAL4</i> | <i>so10&gt;CG9797-RNAiTRiP</i> | lethal?   |
| 31956  | TRiP        | CG17806                   | x | <i>so10-GAL4</i> |                                | /         |
| 33679  | TRiP        | toy                       | x | <i>so10-GAL4</i> | <i>so10&gt;toy-RNAiTRiP</i>    | /         |
| 32486  | TRiP        | ey                        | x | <i>so10-GAL4</i> | <i>so10&gt;ey-RNAiTRiP</i>     | rough eye |
| 27992  | TRiP        | Hr96                      | x | <i>so10-GAL4</i> |                                | /         |
| 33624  | TRiP        | Hr39                      | x | <i>so10-GAL4</i> |                                | /         |
| 26315  | TRiP        | ttk                       | x | <i>so10-GAL4</i> | <i>so10&gt;ttk-RNAiTRiP</i>    | /         |
| 5130   | Bloomington | mCD8::GFP<br>(expression) | x | <i>so10-GAL4</i> | <i>so10&gt;mCD8::GFP</i>       | /         |

## Supplementary Data: PWMs used for binding site predictions

AC Ey  
XX  
ID Ey  
XX

| PO | A   | C   | G   | T   |
|----|-----|-----|-----|-----|
| 1  | 18  | 167 | 34  | 137 |
| 2  | 223 | 46  | 152 | 200 |
| 3  | 19  | 242 | 83  | 298 |
| 4  | 23  | 174 | 263 | 182 |
| 5  | 21  | 27  | 444 | 150 |
| 6  | 57  | 12  | 63  | 509 |
| 7  | 47  | 25  | 567 | 3   |
| 8  | 20  | 167 | 20  | 438 |
| 9  | 1   | 133 | 379 | 132 |
| 10 | 13  | 540 | 3   | 89  |
| 11 | 409 | 3   | 231 | 2   |
| 12 | 33  | 102 | 173 | 336 |
| 13 | 1   | 59  | 14  | 568 |
| 14 | 8   | 285 | 337 | 15  |
| 15 | 325 | 0   | 300 | 18  |
| 16 | 217 | 36  | 197 | 193 |
| 17 | 8   | 66  | 546 | 23  |
| 18 | 7   | 305 | 12  | 318 |
| 19 | 28  | 5   | 595 | 15  |
| 20 | 27  | 13  | 153 | 446 |
| 21 | 227 | 12  | 358 | 38  |
| 22 | 464 | 71  | 45  | 58  |
| 23 | 360 | 53  | 167 | 61  |
| 24 | 187 | 93  | 200 | 158 |
| 25 | 124 | 113 | 242 | 160 |

XX

//

AC Toy

XX

ID Toy

XX

| PO | A | C | G | T |
|----|---|---|---|---|
| 1  | 0 | 5 | 0 | 0 |
| 2  | 1 | 4 | 0 | 0 |
| 3  | 2 | 2 | 1 | 0 |
| 4  | 1 | 4 | 0 | 0 |
| 5  | 0 | 0 | 0 | 5 |
| 6  | 0 | 5 | 0 | 0 |
| 7  | 5 | 0 | 0 | 0 |
| 8  | 0 | 3 | 0 | 2 |
| 9  | 0 | 1 | 1 | 3 |
| 10 | 0 | 3 | 2 | 0 |
| 11 | 3 | 0 | 2 | 0 |
| 12 | 0 | 1 | 1 | 3 |

XX

//

AC Ttk

XX

ID Ttk

XX

| PO | A  | C | G  | T  |
|----|----|---|----|----|
| 1  | 29 | 6 | 12 | 3  |
| 2  | 7  | 1 | 1  | 40 |



|    |        |     |     |     |
|----|--------|-----|-----|-----|
| 3  | 1      | 0   | 9   | 40  |
| 4  | 34     | 0   | 17  | 0   |
| 5  | 0      | 0   | 0   | 52  |
| 6  | 0      | 52  | 0   | 0   |
| 7  | 0      | 52  | 0   | 0   |
| 8  | 0      | 1   | 0   | 50  |
| 9  | 1      | 5   | 22  | 22  |
| 10 | 2      | 9   | 12  | 5   |
| XX |        |     |     |     |
| // |        |     |     |     |
| AC | CG7928 |     |     |     |
| XX |        |     |     |     |
| ID | CG7928 |     |     |     |
| XX |        |     |     |     |
| PO | A      | C   | G   | T   |
| 1  | 30     | 302 | 42  | 70  |
| 2  | 455    | 0   | 0   | 3   |
| 3  | 0      | 0   | 449 | 9   |
| 4  | 0      | 1   | 456 | 1   |
| 5  | 0      | 0   | 454 | 4   |
| 6  | 214    | 185 | 14  | 45  |
| 7  | 16     | 44  | 6   | 392 |
| 8  | 96     | 15  | 338 | 9   |
| 9  | 35     | 272 | 145 | 6   |
| 10 | 274    | 84  | 72  | 28  |
| 11 | 135    | 108 | 129 | 86  |
| 12 | 248    | 60  | 93  | 57  |
| 13 | 266    | 122 | 41  | 25  |
| 14 | 209    | 95  | 89  | 61  |
| 15 | 7      | 5   | 2   | 5   |
| 16 | 2      | 11  | 0   | 6   |
| 17 | 3      | 8   | 5   | 3   |
| 18 | 3      | 14  | 0   | 0   |
| XX |        |     |     |     |
| // |        |     |     |     |
| AC | Gsc    |     |     |     |
| XX |        |     |     |     |
| ID | Gsc    |     |     |     |
| XX |        |     |     |     |
| PO | A      | C   | G   | T   |
| 1  | 0      | 0   | 0   | 22  |
| 2  | 22     | 0   | 0   | 0   |
| 3  | 22     | 0   | 0   | 0   |
| 4  | 0      | 0   | 0   | 22  |
| 5  | 0      | 22  | 0   | 0   |
| 6  | 0      | 14  | 2   | 6   |
| XX |        |     |     |     |
| // |        |     |     |     |
| AC | Side   |     |     |     |
| XX |        |     |     |     |
| ID | Side   |     |     |     |
| XX |        |     |     |     |
| PO | A      | C   | G   | T   |
| 1  | 12     | 0   | 6   | 5   |
| 2  | 17     | 3   | 3   | 0   |
| 3  | 21     | 2   | 0   | 0   |
| 4  | 16     | 6   | 1   | 0   |
| 5  | 0      | 23  | 0   | 0   |
| 6  | 23     | 0   | 0   | 0   |
| 7  | 0      | 10  | 9   | 4   |

|        |     |    |    |    |
|--------|-----|----|----|----|
| 8      | 5   | 18 | 0  | 0  |
| 9      | 1   | 1  | 0  | 21 |
| 10     | 0   | 0  | 23 | 0  |
| 11     | 0   | 5  | 2  | 15 |
| XX     |     |    |    |    |
| //     |     |    |    |    |
| AC Dsx |     |    |    |    |
| XX     |     |    |    |    |
| ID Dsx |     |    |    |    |
| XX     |     |    |    |    |
| PO     | A C | G  | T  |    |
| 1      | 0 3 | 0  | 0  |    |
| 2      | 0 0 | 0  | 3  |    |
| 3      | 2 0 | 1  | 0  |    |
| 4      | 0 3 | 0  | 0  |    |
| 5      | 2 0 | 0  | 1  |    |
| 6      | 3 0 | 0  | 0  |    |
| 7      | 2 0 | 0  | 1  |    |
| 8      | 0 0 | 3  | 0  |    |
| 9      | 0 0 | 0  | 3  |    |
| 10     | 0 1 | 1  | 1  |    |
| 11     | 2 0 | 1  | 0  |    |
| 12     | 0 1 | 0  | 2  |    |
| 13     | 1 1 | 0  | 1  |    |
| 14     | 3 0 | 0  | 0  |    |
| XX     |     |    |    |    |
| //     |     |    |    |    |
